# Supplementary material for: Profiling, isolation and characterisation of beneficial microbes from the seed microbiomes of drought tolerant wheat
Source: PubMed Central journal article supplement (PMC8184954; doi:10.1038/s41598-021-91351-8), 2021-06-07

# Profiling, Isolation and Characterisation of Beneficial Microbes from the Seed Microbiomes of Drought Tolerant Wheat

Holly Hone\*<sup>1</sup>, Ross Mann<sup>1</sup>, Guodong Yang<sup>1,3</sup>, Jatinder Kaur<sup>1</sup>, Ian Tannenbaum<sup>1,2</sup>, Tongda Li<sup>1,2</sup>, German Spangenberg<sup>1,2</sup> and Timothy Sawbridge<sup>1,2</sup>

<sup>1</sup>Agriculture Victoria, AgriBio, Centre for AgriBioscience, Bundoora, VIC, Australia.

<sup>2</sup>School of Applied Systems Biology, La Trobe University, Bundoora, VIC, Australia.

<sup>3</sup>College of Animal Science and Technology, Henan University of Science and Technology, Luoyang, Henan, People's Republic of China

Supplementary Figure 1. Phylogram of isolates of *Curtobacterium* species based on MALDI-TOF protein spectra

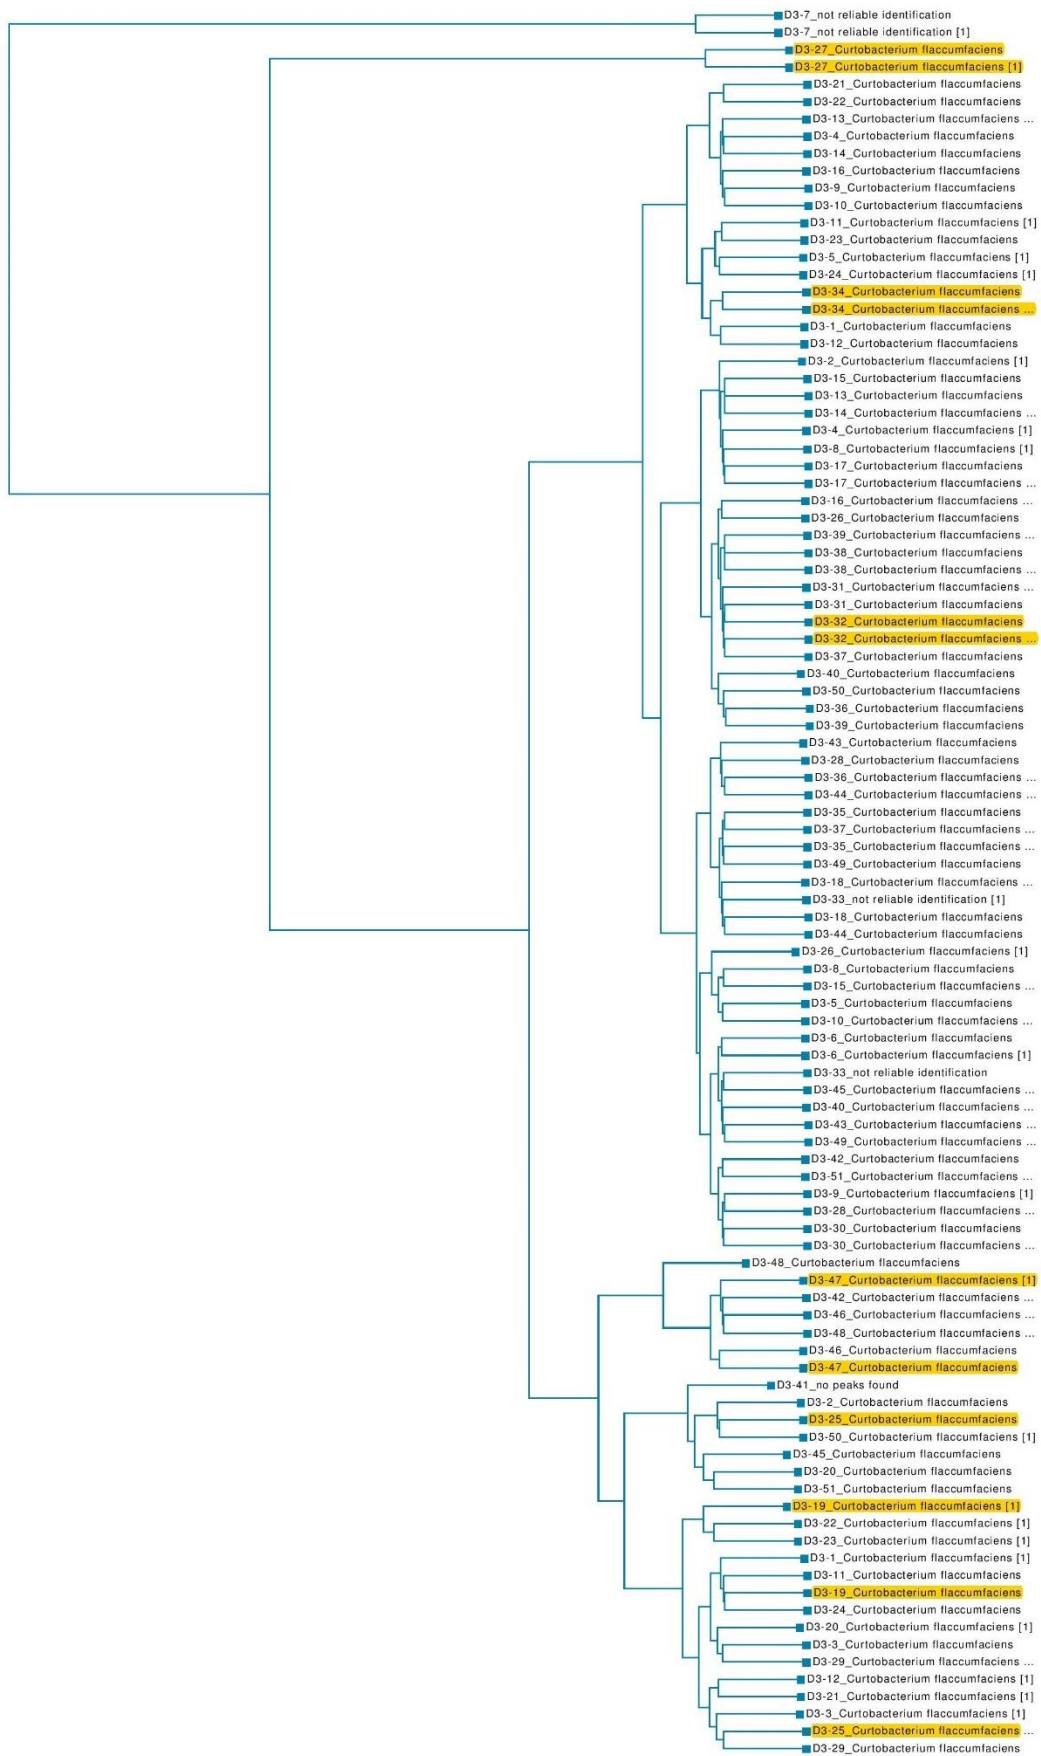



Supplementary Table 1. Pedigree of examined crops

| <b>Crop</b>    | <b>VASC_ID</b>         | <b>Drought Susceptibility Index</b> | <b>Source</b>         | <b>Line name</b>            | <b>Origin</b> | <b>Status</b> |
|----------------|------------------------|-------------------------------------|-----------------------|-----------------------------|---------------|---------------|
| <b>Wheat</b>   | DAS5_001935, Line 1    | Tolerant                            | World Wide            | Tunis23                     | Tunisia       | Land race     |
|                | DAS5_001496, Line 2    | Tolerant                            | World Wide            | IDO629                      | USA           | Cultivar      |
|                | DAS5_005489, Line 3    | Tolerant                            | Company breeding line |                             |               | Breeding line |
|                | DAS5_CALINGIRI, Line 4 | Tolerant                            | Flour Samples         | Calingiri                   | Australia     | Cultivar      |
|                | DAS5_002917, Line 5    | Susceptible                         | AWCC                  | RAVEN                       |               |               |
|                | DAS5_003811, Line 6    | Susceptible                         | World Wide            | CIGM91.345-5                | Mexico        |               |
|                | DAS5_BRAHAM, Line 7    | Susceptible                         | Flour Samples         | Braham                      | Australia     | Cultivar      |
| <b>Spelt</b>   |                        |                                     | Honest To Goodness    | ST1040                      | Australia     |               |
| <b>Oat</b>     |                        |                                     | Company breeding line |                             |               | Breeding line |
| <b>Barley</b>  |                        |                                     | Seednet               | Hindmarsh (formerly VB0324) | Australia     | Cultivar      |
| <b>Ryecorn</b> |                        |                                     | Company breeding line |                             |               | Breeding line |

All experimental research and field trials on plants (including their collection) was conducted in compliance with Victorian, federal, and international guidelines and legislation.

Supplementary Table 2. Genus and number of microbial isolates from Line 3 and Line 4

|                       | Line 3 | Line 4 |
|-----------------------|--------|--------|
| <i>Arthrobacter</i>   | 0      | 49     |
| <i>Clavibacter</i>    | 0      | 0      |
| <i>Curtobacterium</i> | 49     | 0      |
| <i>Erwinia</i>        | 0      | 0      |
| <i>Rathayibacter</i>  | 0      | 0      |
| <i>Paenibacillus</i>  | 0      | 0      |
| <i>Pantoea</i>        | 0      | 0      |
| <i>Pseudomonas</i>    | 0      | 0      |
| No identification     | 2      | 7      |
| <b>Total</b>          | 51     | 56     |

Supplementary Table 3. ANOVA analysis identified the 60 most significant OTUs when comparing microbiomes under drought conditions and microbiomes under rainfed conditions.

| OTU number. | OTU ID                           | Genera                    | P-value  | BH Q-value |
|-------------|----------------------------------|---------------------------|----------|------------|
| 1           | 9af3467db68cf6063627304cecd46a65 | <i>Pseudomonas*</i>       | 9.04E-18 | 2.30E-13   |
| 2           | 7ff346973a282aa55de296afdb5d74af | Unknown                   | 2.11E-15 | 2.69E-11   |
| 3           | 945f562bda86790338922e12f9854407 | <i>Flavobacterium</i>     | 7.74E-13 | 6.57E-09   |
| 4           | 8735f92a7f18db944bc86277fbd3222  | Unknown                   | 1.72E-12 | 1.10E-08   |
| 5           | fcd80f0cf279eff3c50b66a78d98beeb | <i>Amycolatopsis</i>      | 2.99E-12 | 1.52E-08   |
| 6           | 8599524cec26e00cc7df72e7ecc01220 | Unknown                   | 1.57E-11 | 6.64E-08   |
| 7           | d829bee4984f82ffc2453212157caf96 | <i>Bradyrhizobium</i>     | 3.68E-11 | 1.68E-07   |
| 8           | cc761daf51f27c453da57f3f1f0ff5cc | <i>Pantoea*</i>           | 5.80E-11 | 1.68E-07   |
| 9           | 0a023b056a85b92a1ca8214e78a9c45a | <i>Skermanella</i>        | 5.96E-11 | 1.89E-07   |
| 10          | 8154c989085dcab535c58fd5a7a18220 | <i>Rubrobacter</i>        | 7.45E-11 | 1.89E-07   |
| 11          | a869b422007c6d75482b0e9e0338b95c | Unknown                   | 1.64E-10 | 3.79E-07   |
| 12          | 5f8db894a571d35c9d2fa4f8df8581f9 | <i>Massilia</i>           | 2.16E-10 | 4.59E-07   |
| 13          | 5afec052157f7768bf459883f118a638 | <i>Flavobacterium</i>     | 4.25E-10 | 8.32E-07   |
| 14          | 6abc517aa40e9e7b9c652902fe04bb1a | Unknown                   | 4.84E-10 | 8.80E-07   |
| 15          | 20425d99034cf4044217704b16934e27 | <i>Noviherbaspirillum</i> | 5.63E-10 | 9.54E-07   |
| 16          | 889f1bc31887efea2354ba099342a203 | <i>Streptomyces</i>       | 6.36E-10 | 1.01E-06   |
| 17          | d40c63c872b5cfe4bb4caa9738d10c1f | Uncultured                | 3.81E-09 | 5.49E-06   |
| 18          | 35d20da789dde8d76e4389fd6d30cc9d | <i>Dactylosporangium</i>  | 3.10E-09 | 5.49E-06   |
| 19          | 09f944acc15518b31e5803e1e4cb4e43 | <i>Duganella</i>          | 4.35E-09 | 5.49E-06   |
| 20          | 432b565bc288a18487cfa84b311b7469 | Unknown                   | 4.47E-09 | 5.49E-06   |
| 21          | 205e9006842d47d1a2d1caf6a96e0c88 | <i>Microvirga</i>         | 4.53E-09 | 5.49E-06   |
| 22          | f6c528c217081be9871de0fc58b89408 | <i>Variovorax</i>         | 5.66E-09 | 6.54E-06   |
| 23          | 6e4b50a611f333bfb12f3b9a4a9e8b61 | Uncultured                | 1.09E-08 | 1.20E-05   |
| 24          | f37fc1dccfeba0004cbeb4f1ad6083c6 | <i>Duganella</i>          | 1.68E-08 | 1.78E-05   |
| 25          | 120eba657e42a11a5c29f97b90f02035 | <i>Streptomyces</i>       | 2.13E-08 | 2.17E-05   |
| 26          | 3a66a38841ba6877568198b9dac3a1dc | <i>Lysobacter</i>         | 2.34E-08 | 2.29E-05   |
| 27          | ef0c7928901deab56b8d8abef337ac5c | <i>Rubrobacter</i>        | 2.95E-08 | 2.78E-05   |
| 28          | cc34ab07649c94630cbc697762ac4b32 | <i>Candidatus</i>         | 4.14E-08 | 3.76E-05   |
| 29          | 79029fa983ec4eda60117a273a52cfc0 | <i>Caulobacter</i>        | 4.47E-08 | 3.92E-05   |
| 30          | 0f8ac0d81dd6449a43b34fcb184efd8f | <i>Candidatus</i>         | 4.86E-08 | 4.12E-05   |
| 31          | cb5b9907447a49154182dee3ea78d16e | <i>Acidibacter</i>        | 5.96E-08 | 4.89E-05   |
| 32          | 0f18144d308ada95632ab5193d92073f | <i>Pseudomonas*</i>       | 6.77E-08 | 5.38E-05   |
| 33          | bf321c05d79f766c0099afb9ecc42f52 | <i>Streptomyces</i>       | 1.21E-07 | 9.32E-05   |
| 34          | b712fd712748de96eb148834a623ba1  | <i>Geodermatophilus</i>   | 1.91E-07 | 1.43E-04   |
| 35          | a285136eb52ed887013aaa7917ce5051 | RB41                      | 3.79E-07 | 2.75E-04   |
| 36          | bc3676c17839094c4fa8e33268905268 | <i>Candidatus</i>         | 4.40E-07 | 3.11E-04   |
| 37          | e08272633711f2ea424a3232ed337e8  | Unknown                   | 1.38E-06 | 9.45E-04   |
| 38          | 1d145835e7f0188562322f4eefb02657 | Uncultured                | 1.72E-06 | 1.15E-03   |

|    |                                  |                      |          |          |
|----|----------------------------------|----------------------|----------|----------|
| 39 | bc23d6db3bfb2c79f5eb1cec8f01f841 | Uncultured           | 1.86E-06 | 1.21E-03 |
| 40 | 6e1575cfc367c39ec52c4d1e699a1fb2 | <i>Cellvibrio</i>    | 2.14E-06 | 1.21E-03 |
| 41 | 132ffe9a542685a423a59236950b46b0 | Unknown              | 2.27E-06 | 1.36E-03 |
| 42 | bb740c10ad31d5779e628bccffdb5015 | <i>Skermanella</i>   | 2.30E-06 | 1.40E-03 |
| 43 | e8246466fe381d8a8d5c10cb90640eb3 | <i>Sorangium</i>     | 2.49E-06 | 1.48E-03 |
| 44 | 9b4be26e7bb3a23d25e080a3bba619f6 | <i>Arthrobacter*</i> | 2.72E-06 | 1.57E-03 |
| 45 | d5620170bb86a5572c5c1b92cd915f05 | Uncultured           | 2.93E-06 | 1.66E-03 |
| 46 | 00337a2c0aa8af2c100ebca3424b94a1 | Uncultured           | 4.37E-06 | 2.42E-03 |
| 47 | a08ee4a8aa1ece798d78fae2b9ad0401 | Uncultured           | 5.24E-06 | 2.83E-03 |
| 48 | 278a455d0edc27f3fcfb16ad5243ce26 | Unknown              | 5.62E-06 | 2.98E-03 |
| 49 | b8c4ed03d7d91546b9fad80b80135a3  | <i>Blastococcus</i>  | 6.64E-06 | 3.45E-03 |
| 50 | 44e2ab81e5e7cff6d965651c707b9479 | Uncultured           | 7.92E-06 | 4.03E-03 |
| 51 | caa68010e3e574c4f1069b0ea4e6437e | Blyi10               | 8.72E-06 | 4.31E-03 |
| 52 | fbcf878584c87b171eafb171b8a0fef  | <i>Rubrobacter</i>   | 8.83E-06 | 4.31E-03 |
| 53 | 1c2b8892a0d7f828d72808cd01cfd199 | <i>Devosia</i>       | 8.98E-06 | 4.31E-03 |
| 54 | 8177ba9a29c738a90c530f54f4561cb1 | Unknown              | 9.37E-06 | 4.41E-03 |
| 55 | 0fa9b44d52836d2f173f4ac532f8a013 | <i>Skermanella</i>   | 1.03E-05 | 4.75E-03 |
| 56 | a9164d01308501b57afa0625a15b0f   | <i>Allorhizobium</i> | 1.36E-05 | 6.16E-03 |
| 57 | d99a0b2472cd7caecdd8d63ac9cb3fdf | <i>Rubrobacter</i>   | 1.38E-05 | 6.16E-03 |
| 58 | 26005dfb7ad2e8cddb139846af329663 | <i>Bacillus</i>      | 1.41E-05 | 6.19E-03 |
| 59 | c22885a993cabb139b7d8744e6ff7fc  | <i>Labrys</i>        | 1.50E-05 | 6.39E-03 |
| 60 | ef98cc2984cd3ce0ca6a46589a6df194 | Unknown              | 1.51E-05 | 6.39E-03 |

\*genus was isolated from wheat seeds

Supplementary Table 4. ANOVA analysis identified the 60 most significant OTUs when comparing microbiomes of drought tolerant lines and microbiomes of drought susceptible lines.

| OTU number. | OTU ID                            | Genera              | P-value  | BH Q-value |
|-------------|-----------------------------------|---------------------|----------|------------|
| 1           | 2e94aaded5896273b56726409d750804  | Unknown             | 1.50E-11 | 3.81E-07   |
| 2           | 9c262c0fed9522982fd2297202ee5a83  | Uncultured          | 4.61E-10 | 5.86E-06   |
| 3           | aebd4d0ae6384594a5882a958796ded   | Uncultured          | 5.09E-08 | 0.0004317  |
| 4           | f1be300df01babcf1897e6103507179f  | Uncultured          | 1.08E-07 | 0.0006843  |
| 5           | 8b49e37e3c87b34b3cf8fa98e87b9e56  | Unknown             | 6.76E-07 | 0.003438   |
| 6           | d2e8afc64cc3c6dde961a4db0a44d26e  | <i>Gemmatimonas</i> | 8.68E-07 | 0.00368    |
| 7           | 111e8e48a5111d4360329eef12acd3b7  | Uncultured          | 1.87E-06 | 0.006801   |
| 8           | ce7ee6ce5f9dd8b3191a0fecdd7745de4 | Unknown             | 2.14E-06 | 0.006805   |
| 9           | d6bda8545c415bbc3cfa95f43e51e5f   | Uncultured          | 5.41E-06 | 0.01529    |
| 10          | cc2a396f24d8239e540d765b422b04eb  | Uncultured          | 6.29E-06 | 0.01599    |
| 11          | 568bee5fcaa9b6912463e88ef964f3e9  | Uncultured          | 7.11E-06 | 0.01644    |
| 12          | 8795f8559d860648a3ccc7fe26f49283  | Uncultured          | 8.89E-06 | 0.01885    |
| 13          | 320fc5aa1aec10458407aedf8f39698f  | Unknown             | 9.73E-06 | 0.01904    |
| 14          | 02b19fa4ce6a9bd677693ab7e4fceeaa7 | Uncultured          | 1.20E-05 | 0.02174    |
| 15          | d9fe8350aa00c86b865d2f3e18ab18cd  | Unknown             | 1.59E-05 | 0.02693    |
| 16          | 1c29266ba1c7bc49e8c16e1d5b773041  | Uncultured          | 2.96E-05 | 0.04697    |
| 17          | a86ecef5ef052958cda9d725ee257cae  | <i>Gemmatimonas</i> | 3.56E-05 | 0.05243    |
| 18          | 3e12c438e2563f99c446b789e0d13525  | <i>Gemmatirosa</i>  | 3.71E-05 | 0.05243    |
| 19          | d1a113d32ccfe6f0c510a20b40a45d91  | <i>Gemmatimonas</i> | 4.02E-05 | 0.05377    |
| 20          | 7177a92fed62adf72cc159802ac88113  | <i>Gemmatirosa</i>  | 5.70E-05 | 0.07248    |
| 21          | 07f7a53f8a49890a6938be8e5f997f42  | <i>Gemmatimonas</i> | 6.01E-05 | 0.07283    |
| 22          | 81cf26ae410f4dc2c3782b60aeda6bad  | Uncultured          | 8.38E-05 | 0.09685    |
| 23          | 097ced6193211c4c49697375f9c0b5e5  | Uncultured          | 9.62E-05 | 0.1063     |
| 24          | 3576c76306e73ff487d82960da64c73d  | Uncultured          | 1.09E-04 | 0.116      |
| 25          | 71864b88007f7d9b132ea92e97e7a090  | Uncultured          | 2.97E-04 | 0.3025     |
| 26          | 710cbf014a0c8791cfc0c6262e928b04  | Unknown             | 3.62E-04 | 0.3544     |
| 27          | 56841717d2ee29838c93a714e6967889  | Uncultured          | 4.00E-04 | 0.3771     |
| 28          | c8e6b05e1033d85877e0b41d1a575b9c  | <i>Gemmatimonas</i> | 4.64E-04 | 0.4211     |
| 29          | f34b8c1235d47d75f97eb9680f0a5e4c  | Unknown             | 5.34E-04 | 0.468      |
| 30          | 1e542d2112237ddb072880742ade6180  | <i>Gemmata</i>      | 5.57E-04 | 0.4725     |
| 31          | eeb52cc84b4e2c5cea79df01c6787481  | <i>Jahnella</i>     | 6.00E-04 | 0.4923     |
| 32          | 6d987a16ec34bb6be3b91dc00febd060  | Ellin6055           | 7.09E-04 | 0.5411     |
| 33          | 13bb87c1dcac1cb19f6d9a1d2eee1518  | Unknown             | 7.54E-04 | 0.5411     |
| 34          | 77a6d64e7b0ba0a9207d305cbd46dc5e  | Uncultured          | 8.25E-04 | 0.5411     |
| 35          | 314d1f2b81ed24b612e719d7b6669170  | Uncultured          | 1.09E-03 | 0.5411     |
| 36          | 920a901a455687d1c52d3db8a988a8da3 | Uncultured          | 1.23E-03 | 0.5411     |
| 37          | f42b602657b3a6357196f2bbfae84ea4  | Uncultured          | 1.30E-03 | 0.5411     |
| 38          | 75f0d252adb751ac1592928a7d45d070  | Unknown             | 1.42E-03 | 0.5411     |



|    |                                  |                        |          |        |
|----|----------------------------------|------------------------|----------|--------|
| 39 | f85631d4c3ad28c56dbfd5389ae3d656 | Unknown                | 1.45E-03 | 0.5411 |
| 40 | ab3abeeb031bdd59155c64c511597f76 | Unknown                | 1.54E-03 | 0.5411 |
| 41 | 8bffc39805f7a62a7b6f44ed0857f583 | <i>Gemmatirosa</i>     | 1.57E-03 | 0.5411 |
| 42 | 8ce415fd299c36132bf28fce66958a18 | Unknown                | 1.61E-03 | 0.5411 |
| 43 | 3d254eae6330c3af118ad55d15587525 | SH-PL14                | 1.71E-03 | 0.5411 |
| 44 | 8076cdbe1ee2b24b7c678c67b3ff8c5f | Uncultured             | 1.77E-03 | 0.5411 |
| 45 | 02db0dd35b045af9590bd3f21b7dc533 | <i>Gemmatirosa</i>     | 1.83E-03 | 0.5411 |
| 46 | 81add03374eb9a0ac1ac216c305e3fef | Unknown                | 1.98E-03 | 0.5411 |
| 47 | 2cdb2f0813b89875f92c58e216b6a3d2 | Uncultured             | 2.10E-03 | 0.5411 |
| 48 | 71939f43e866e0c70c95d653f060abef | Uncultured             | 2.32E-03 | 0.5411 |
| 49 | 6643beaeb166111252c7c651d7224f58 | <i>Blastocatella</i>   | 2.48E-03 | 0.5411 |
| 50 | 895f12b52aba800883fb938fa3bdcd3  | Unknown                | 2.53E-03 | 0.5411 |
| 51 | 8cdb149aee5a869c9e7a68b271f0a6cf | <i>Litorilinea</i>     | 2.64E-03 | 0.5411 |
| 52 | c1427c78632ef67b22025f95e7c34dd7 | <i>Gemmatirosa</i>     | 2.68E-03 | 0.5411 |
| 53 | ba7b222723a8230a615cab9eff291e99 | Uncultured             | 2.96E-03 | 0.5411 |
| 54 | 222415525d7e7a1e93033daceb032922 | <i>Chtoniobacter</i>   | 2.99E-01 | 0.5411 |
| 55 | e5b8aa4e9ca9b255a6e1e7ea5f0c576e | Uncultured             | 3.10E-03 | 0.5411 |
| 56 | edd59c94a0cb54b3e84c87f42f0e8a6a | Uncultured             | 3.21E-03 | 0.5411 |
| 57 | a53e67cee42c20eed1034edf03df170f | <i>Mucilagibacter</i>  | 3.25E-03 | 0.5411 |
| 58 | 497a26126c9e726c768bdec79e8c4e9b | <i>Curtobacterium*</i> | 3.29E-03 | 0.5411 |
| 59 | 30242ff322d5761fc7c180f70f895606 | Uncultured             | 3.37E-03 | 0.5411 |
| 60 | 5fb8051249a15e13713bc46335d32c25 | Unknown                | 3.39E-03 | 0.5411 |

\*genus was isolated from wheat seeds

Supplementary Figure 3. Shoot lengths of wheat, barley, oats, ryecorn and spelt inoculated with *Cf* D3-25 and *Ar* sp. D4-14 to assess their biostimulation effects across a range of Triticeae species.

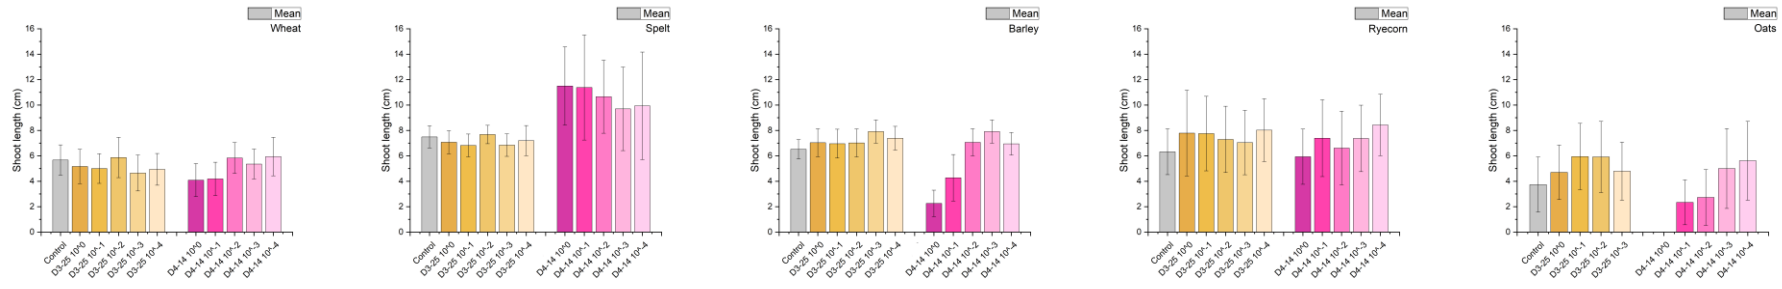

Supplement: 41598_2021_91351_MOESM1_ESM.pdf [file 41598_2021_91351_MOESM1_ESM.pdf]
